# Supplementary figures and images for: Isolation, Characterization, and Antibacterial Activity of Hard-to-Culture Actinobacteria from Cave Moonmilk Deposits
Source: MDPI journal article supplement (doi:10.3390/antibiotics7020028), 2018-03-22

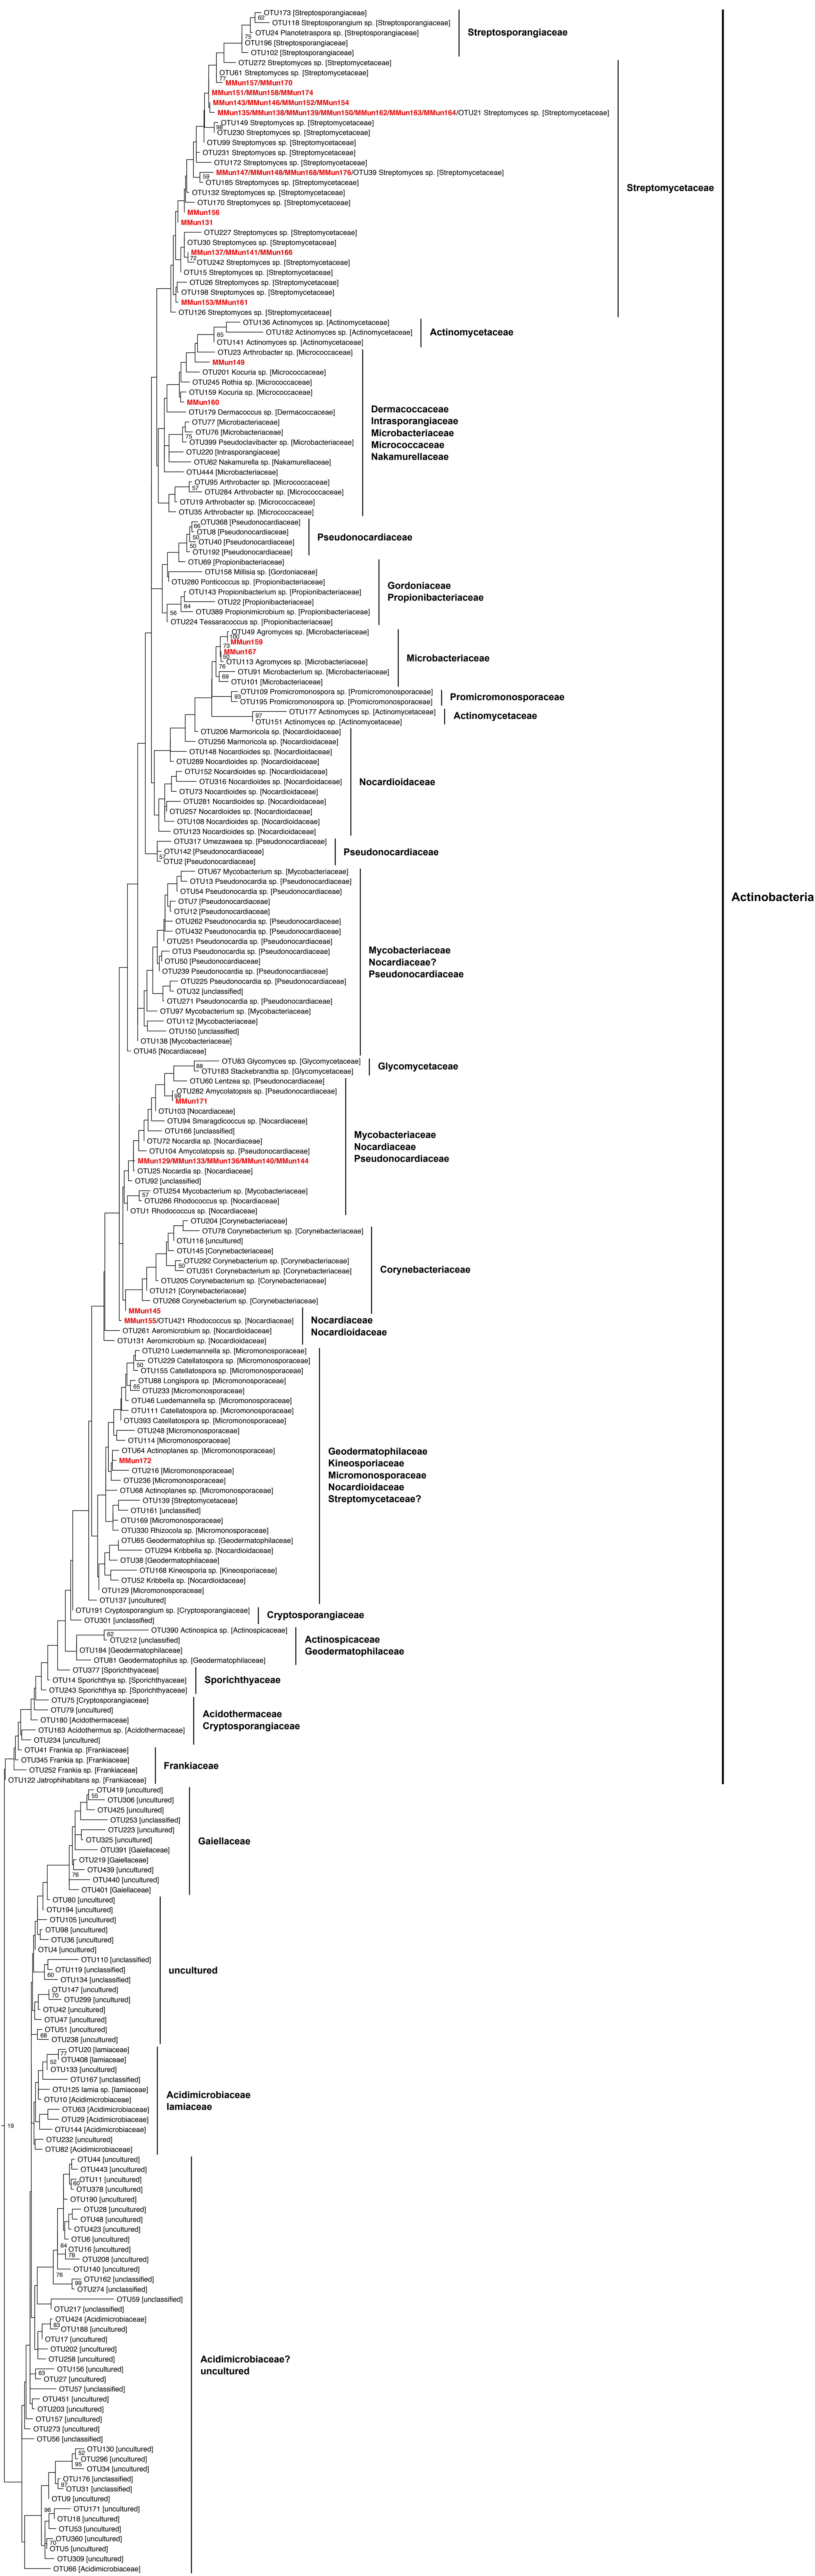

Supplement: s1 [file s1]
